# Supplementary material
Source: ML conference proceedings conference paper supplement (https://openreview.net/forum?id=3e5nHhhRK93)
Supplement: supplementary_material [file attachment]

Table 6: Hyper-parameters

| Parameter                   | Value           |
|-----------------------------|-----------------|
| $\gamma$                    | 0.90            |
| $\epsilon$                  | 0.1             |
| $\beta$                     | 0.1             |
| $\lambda$                   | 0.1             |
| $N$                         | 32              |
| $T$                         | 1000            |
| $T_w$                       | 10              |
| $e$                         | 128             |
| $\eta_A$                    | -1.0            |
| $\eta_C$                    | 0.1             |
| $\eta_p$                    | 0.1             |
| $\eta_i$                    | 1.0             |
| $\eta_1$                    | 1.0             |
| $\eta_2$                    | 0.00001         |
| $\#attentionhead$           | 2               |
| attention dimension         | 1024            |
| layers(Embed <sub>o</sub> ) | $[n, e]$        |
| layers(Embed <sub>x</sub> ) | $[x, e]$        |
| layers(Embed <sub>a</sub> ) | $[m, e]$        |
| layers(Embed <sub>s</sub> ) | $[(K + 1)e, e]$ |
| layers(Proj <sub>s</sub> )  | $[e, n_s]$      |
| layers(Proj <sub>a</sub> )  | $[e, n_a]$      |
| layers(Proj <sub>v</sub> )  | $[e, 1]$        |
| learning rate (pretraining) | 0.00001         |
| learning rate (finetuning)  | 0.0005          |

## A ADDITIONAL METHODOLOGY DETAILS

During the RL study, the agent generate its action from its policy  $\pi(a_t|s_t)$  and push the environment stage forward. This interactive process yields the following episode sequence:

$$\tau_{0:T} = \{s_0, a_0, r_0, s_1, a_1, r_1, \dots, s_T, a_T, r_T\} \quad (13)$$

in which  $T$  means the episode ends or reaching the maximum time length. RL then solves the sequential decision making problem by finding  $\pi$  such that  $\max_{\pi} \mathbb{E}_{\tau \sim \pi}(R)$  in which the episode return defined as

$$R := \sum_{t=0}^T \gamma^t r_t \quad (14)$$

with  $\gamma \in [0, 1)$  as the discounted factor.

The classical PPO methodology inherits from the famous actor-critic framework. The critic generates the state value estimate  $V(s)$ , with its loss calculated from Bellman function by bootstrapping the state value function

$$L^{\text{Critic}} = \mathbb{E}_{s \sim d^{\pi}} [(r_t + \gamma(V_{\theta_{\text{old}}}(s_{t+1}) - V_{\theta}(s_t))^2]$$

On the other hand, generalized advantage estimation (GAE) (Schulman et al., 2016) is employed to help calculate the action advantage  $A_t$  by traversing the episode backward

$$\hat{A}_t = \delta_t + (\gamma\lambda)\delta_{t+1} + \dots + (\gamma\lambda)^{T-t+1}\delta_{T-1} \quad (15)$$

$$\delta_t = r_t + \gamma V(s_{t+1}) - V(s_t) \quad (16)$$

then the actor is learned by maximizing the surrogate objective of  $A_t$  according to the policy-gradient theorem

$$L^{\text{Actor}} = \text{CLIP}(\mathbb{E}_t \frac{\pi_{\theta_{\text{old}}}(a_t|s_t)}{\pi_{\theta}(a_t|s_t)} \hat{A}_t - \beta \text{KL}[\pi_{\theta_{\text{old}}}(\cdot|s_t), \pi_{\theta}(\cdot|s_t)]) \quad (17)$$

Table 7: Environment morphology details

| Environment | $K$ | $n$ | $m$ | $x$  | $m_s$ | $m_a$ | $n_s$ | $n_a$ |
|-------------|-----|-----|-----|------|-------|-------|-------|-------|
| swimmer     | 2   | 2   | 1   | 4    |       |       | 8     | 2     |
| reacher     | 2   | 3   | 1   | 5    |       |       | 11    | 2     |
| hopper      | 3   | 2   | 1   | 5    |       |       | 11    | 3     |
| halfCheetah | 6   | 2   | 1   | 5    |       |       | 17    | 6     |
| walker2D    | 6   | 2   | 1   | 5    |       |       | 17    | 3     |
| ant         | 8   | 2   | 1   | 95   |       |       | 111   | 8     |
| humanoid    | 9   | 6   | 3   | 342  | 20    | 10    | 376   | 17    |
| walker      | 16  | 15  | 4   | 18   | 45    | 25    | 243   | 39    |
| unimal      | 12  | 52  | 2   | 1410 | *     | *     | 624   | 24    |

\*: varied from each agent morphology.

in which the CLIP function means clipping the object by  $[1 - \epsilon, 1 + \epsilon]\hat{A}_t$ , and KL denotes the famous K-L divergence.

A PPO policy update is then conducted by minimizing the objective upon each iteration:

$$L^{\text{PPO}} = -\eta_A L^{\text{Actor}} + \eta_C L^{\text{Critic}}$$

## B ADDITIONAL IMPLEMENTATION DETAILS

For practical consideration, input and output sequences are truncated by a window length  $T_w$ , with padding time mask for episodes shorter than  $T_w$ . The timestep embedding is also considered and concatenated into the latent variable.

To emphasize the instant impact, we further conduct a multi-head attention by querying the target variable and marking the input variable as key and value:

$$\hat{a}_t^p \leftarrow \hat{a}_t^p + \text{Attention}(\mathbf{Q}=\hat{a}_t^p, \mathbf{K}=\mathbf{s}_t^p, \mathbf{V}=\mathbf{s}_t^p), \quad \hat{s}_t^p \leftarrow \hat{s}_t^p + \text{Attention}(\mathbf{Q}=\hat{s}_t^p, \mathbf{K}=\mathbf{a}_{t-1}^p, \mathbf{V}=\mathbf{a}_{t-1}^p) \quad (18)$$

Table 6 lists most hyper-parameters in our implementation.

## C ADDITIONAL ENVIRONMENTAL DETAILS

Table 7 exhibit all environments and their the morphological dimensions. Environments are from platforms including gym-mujoco, unimal and unity.

Table 8 shows statistics of all dataset used in the pretraining phase. Pretraining is computed distributed on 4 workers, each with 8 gpu, 4000 cpu and 400M memory. For both pretraining and finetuning, the ADAM optimizer is applied with the decay weight of 0.01.

Table 8: Pretraining dataset details

| Environment | Source | sampling agent | # samples | # episodes | ave ep return         | ave ep length       |
|-------------|--------|----------------|-----------|------------|-----------------------|---------------------|
| hopper      | D4RL   | expert         | 999,494   | 1,027      | 3511.36 $\pm$ 328.59  | 973.22 $\pm$ 97.84  |
|             | D4RL   | medium-expert  | 1,999,400 | 3,213      | 2089.88 $\pm$ 1039.96 | 622.28 $\pm$ 263.22 |
|             | D4RL   | medium         | 999,906   | 2,186      | 1422.06 $\pm$ 378.95  | 457.41 $\pm$ 110.88 |
|             | D4RL   | medium-replay  | 402,000   | 2,041      | 467.30 $\pm$ 511.03   | 196.96 $\pm$ 195.15 |
|             | D4RL   | random         | 999,996   | 45,239     | 18.40 $\pm$ 17.45     | 22.10 $\pm$ 11.99   |
| halfCheetah | D4RL   | expert         | 1,000,000 | 1,000      | 10656.43 $\pm$ 441.68 | 1000.00 $\pm$ 0.0   |
|             | D4RL   | medium-expert  | 2,000,000 | 2,000      | 7713.38 $\pm$ 2970.24 | 1000.00 $\pm$ 0.0   |
|             | D4RL   | medium         | 1,000,000 | 1,000      | 4770.33 $\pm$ 355.75  | 1000.00 $\pm$ 0.0   |
|             | D4RL   | medium-replay  | 202,000   | 202        | 3093.29 $\pm$ 1680.69 | 1000.00 $\pm$ 0.0   |
|             | D4RL   | random         | 1,000,000 | 1,000      | -288.80 $\pm$ 80.43   | 1000.00 $\pm$ 0.0   |
| walker2D    | D4RL   | expert         | 999,214   | 1,000      | 4920.51 $\pm$ 136.39  | 999.21 $\pm$ 24.84  |
|             | D4RL   | medium-expert  | 1,999,209 | 2,190      | 3796.57 $\pm$ 1312.28 | 912.88 $\pm$ 194.62 |
|             | D4RL   | medium         | 999,995   | 1,190      | 2852.09 $\pm$ 1095.44 | 840.33 $\pm$ 240.13 |
|             | D4RL   | medium-replay  | 302,000   | 1,093      | 682.70 $\pm$ 895.96   | 276.30 $\pm$ 263.13 |
|             | D4RL   | random         | 999,997   | 48,907     | 1.87 $\pm$ 5.81       | 20.45 $\pm$ 8.46    |
| ant         | D4RL   | expert         | 999,877   | 1,034      | 4620.73 $\pm$ 1409.06 | 967.00 $\pm$ 140.87 |
|             | D4RL   | medium-expert  | 1,999,823 | 2,236      | 3776.93 $\pm$ 1509.93 | 894.38 $\pm$ 243.20 |
|             | D4RL   | medium         | 999,946   | 1,202      | 3051.06 $\pm$ 1180.59 | 831.90 $\pm$ 290.71 |
|             | D4RL   | medium-replay  | 302,000   | 485        | 976.05 $\pm$ 1005.71  | 622.68 $\pm$ 140.87 |
|             | D4RL   | random         | 999,930   | 5,821      | -58.07 $\pm$ 97.76    | 171.78 $\pm$ 281.25 |
| walker      | self   | ppo            | 1,001,861 | 7,928      | 262.74 $\pm$ 281.18   | 126.37 $\pm$ 119.17 |
| unimal      | self   | metamorph      | 1,638,400 | 3,710      | 2.52 $\pm$ 5.21       | 410.44 $\pm$ 410.57 |
